# Supplementary material
Source: publisher figshare collection journal article supplement (https://gsajournals.figshare.com/ndownloader/files/22271544)
Supplement: Supplementary file 1 [file 22271544]

## Sheet: S1-PVT1 exon 4A
	PVT1 exon 4A			Replicates?
	Normal prostate tissue	Benign prostatic hyperplasia	Prostate cancer tissue
	1	2.30077	7.21848
	2.58399	1.67867	8.21766
	2.91637	1.35407	6.86004
	1.60613	2.4841	4.17577
	1.23094	2.56522	2.38074
	1.58994	2.01559	3.03769
	0.457072	2.25052	3.79786
	1	1.39278	0.892195
	1.62685	1.4242	1.12855
	0.849645	0.778415	2.48973
	0.772471	1.56011	2.72535
	1.72868	1.04952	1.51581
	1.25921	1.10828	0.163643
	1.88903	1.12327	0.845999
	1	1.27023	1.97295
	0.866312	0.384337	1.52077
	0.717083	0.791312	0.825646
	0.368123	2.65973	1.442
	0.709872	1.08834	2.05633
	0.908999	0.756044	1.06204
	1	0.778321	7.09414
	2.17735	0.63219	2.02242
		0.774038	2.40746
		1.08982	2.92288
		3.26995	5.64975
		2.24676	1.52699
		4.52597	1.80305
		0.997477	10.6605
		3.59536
		3.74772
		1.74818
		2.00167
		1.73977
		1.59837
		2.33644

## Sheet: S2-PVT1 exon 4B
PVT1 exon 4B			replicates?
Normal prostate tissue	Benign prostatic hyperplasia	Prostate cancer
1	3.72808	5.99197
2.67403	3.76062	5.58563
2.65334	2.59462	5.12601
2.24107	3.13255	5.90929
2.15583	3.09942	4.19108
2.42569	2.01391	5.24628
2.55881	3.33615	5.1392
1	0.723709	0.511636
0.829601	0.633617	0.835795
0.388151	0.372617	2.20696
0.342357	0.828321	0.951845
0.77971	0.327093	0.548017
0.581122	0.757151	1.63197
1.40652	0.838438	1.10157
1	0.842367	1.32018
0.63563	0.179354	1.59776
0.884054	0.381734	0.314779
0.576772	0.241753	0.989157
0.54823	0.547408	1.56794
0.888045	0.66394	0.995087
1	0.667341	1.95094
0.992109	0.411061	0.708639
	0.608472	0.868422
	0.729429	1.09186
	0.770138	2.15535
	0.597512	0.510547
	1.70072	0.877883
	0.822013	2.15304
	0.936794
	0.608356
	0.556012
	1.21177
	0.803002
	0.7831
	1.07956

## Sheet: S3-4A-4B combined
relative_expression	tissue	exon	replicate
1	normal	4A	1
2.58399	normal	4A	1
2.91637	normal	4A	1
1.60613	normal	4A	1
1.23094	normal	4A	1
1.58994	normal	4A	1
0.457072	normal	4A	1
1	normal	4A	2
1.62685	normal	4A	2
0.849645	normal	4A	2
0.772471	normal	4A	2
1.72868	normal	4A	2
1.25921	normal	4A	2
1.88903	normal	4A	2
1	normal	4A	3
0.866312	normal	4A	3
0.717083	normal	4A	3
0.368123	normal	4A	3
0.709872	normal	4A	3
0.908999	normal	4A	3
1	normal	4A	?
2.17735	normal	4A	?
2.30077	Benign_prostatic_hyperplasia	4A	?
1.67867	Benign_prostatic_hyperplasia	4A	?
1.35407	Benign_prostatic_hyperplasia	4A	?
2.4841	Benign_prostatic_hyperplasia	4A	?
2.56522	Benign_prostatic_hyperplasia	4A	?
2.01559	Benign_prostatic_hyperplasia	4A	?
2.25052	Benign_prostatic_hyperplasia	4A	?
1.39278	Benign_prostatic_hyperplasia	4A	?
1.4242	Benign_prostatic_hyperplasia	4A	?
0.778415	Benign_prostatic_hyperplasia	4A	?
1.56011	Benign_prostatic_hyperplasia	4A	?
1.04952	Benign_prostatic_hyperplasia	4A	?
1.10828	Benign_prostatic_hyperplasia	4A	?
1.12327	Benign_prostatic_hyperplasia	4A	?
1.27023	Benign_prostatic_hyperplasia	4A	?
0.384337	Benign_prostatic_hyperplasia	4A	?
0.791312	Benign_prostatic_hyperplasia	4A	?
2.65973	Benign_prostatic_hyperplasia	4A	?
1.08834	Benign_prostatic_hyperplasia	4A	?
0.756044	Benign_prostatic_hyperplasia	4A	?
0.778321	Benign_prostatic_hyperplasia	4A	?
0.63219	Benign_prostatic_hyperplasia	4A	?
0.774038	Benign_prostatic_hyperplasia	4A	?
1.08982	Benign_prostatic_hyperplasia	4A	?
3.26995	Benign_prostatic_hyperplasia	4A	?
2.24676	Benign_prostatic_hyperplasia	4A	?
4.52597	Benign_prostatic_hyperplasia	4A	?
0.997477	Benign_prostatic_hyperplasia	4A	?
3.59536	Benign_prostatic_hyperplasia	4A	?
3.74772	Benign_prostatic_hyperplasia	4A	?
1.74818	Benign_prostatic_hyperplasia	4A	?
2.00167	Benign_prostatic_hyperplasia	4A	?
1.73977	Benign_prostatic_hyperplasia	4A	?
1.59837	Benign_prostatic_hyperplasia	4A	?
2.33644	Benign_prostatic_hyperplasia	4A	?
7.21848	Prostate_cancer_tissue	4A	?
8.21766	Prostate_cancer_tissue	4A	?
6.86004	Prostate_cancer_tissue	4A	?
4.17577	Prostate_cancer_tissue	4A	?
2.38074	Prostate_cancer_tissue	4A	?
3.03769	Prostate_cancer_tissue	4A	?
3.79786	Prostate_cancer_tissue	4A	?
0.892195	Prostate_cancer_tissue	4A	?
1.12855	Prostate_cancer_tissue	4A	?
2.48973	Prostate_cancer_tissue	4A	?
2.72535	Prostate_cancer_tissue	4A	?
1.51581	Prostate_cancer_tissue	4A	?
0.163643	Prostate_cancer_tissue	4A	?
0.845999	Prostate_cancer_tissue	4A	?
1.97295	Prostate_cancer_tissue	4A	?
1.52077	Prostate_cancer_tissue	4A	?
0.825646	Prostate_cancer_tissue	4A	?
1.442	Prostate_cancer_tissue	4A	?
2.05633	Prostate_cancer_tissue	4A	?
1.06204	Prostate_cancer_tissue	4A	?
7.09414	Prostate_cancer_tissue	4A	?
2.02242	Prostate_cancer_tissue	4A	?
2.40746	Prostate_cancer_tissue	4A	?
2.92288	Prostate_cancer_tissue	4A	?
5.64975	Prostate_cancer_tissue	4A	?
1.52699	Prostate_cancer_tissue	4A	?
1.80305	Prostate_cancer_tissue	4A	?
10.6605	Prostate_cancer_tissue	4A	?
1	normal	4B	?
2.67403	normal	4B	?
2.65334	normal	4B	?
2.24107	normal	4B	?
2.15583	normal	4B	?
2.42569	normal	4B	?
2.55881	normal	4B	?
1	normal	4B	?
0.829601	normal	4B	?
0.388151	normal	4B	?
0.342357	normal	4B	?
0.77971	normal	4B	?
0.581122	normal	4B	?
1.40652	normal	4B	?
1	normal	4B	?
0.63563	normal	4B	?
0.884054	normal	4B	?
0.576772	normal	4B	?
0.54823	normal	4B	?
0.888045	normal	4B	?
1	normal	4B	?
0.992109	normal	4B	?
3.72808	Benign_prostatic_hyperplasia	4B	?
3.76062	Benign_prostatic_hyperplasia	4B	?
2.59462	Benign_prostatic_hyperplasia	4B	?
3.13255	Benign_prostatic_hyperplasia	4B	?
3.09942	Benign_prostatic_hyperplasia	4B	?
2.01391	Benign_prostatic_hyperplasia	4B	?
3.33615	Benign_prostatic_hyperplasia	4B	?
0.723709	Benign_prostatic_hyperplasia	4B	?
0.633617	Benign_prostatic_hyperplasia	4B	?
0.372617	Benign_prostatic_hyperplasia	4B	?
0.828321	Benign_prostatic_hyperplasia	4B	?
0.327093	Benign_prostatic_hyperplasia	4B	?
0.757151	Benign_prostatic_hyperplasia	4B	?
0.838438	Benign_prostatic_hyperplasia	4B	?
0.842367	Benign_prostatic_hyperplasia	4B	?
0.179354	Benign_prostatic_hyperplasia	4B	?
0.381734	Benign_prostatic_hyperplasia	4B	?
0.241753	Benign_prostatic_hyperplasia	4B	?
0.547408	Benign_prostatic_hyperplasia	4B	?
0.66394	Benign_prostatic_hyperplasia	4B	?
0.667341	Benign_prostatic_hyperplasia	4B	?
0.411061	Benign_prostatic_hyperplasia	4B	?
0.608472	Benign_prostatic_hyperplasia	4B	?
0.729429	Benign_prostatic_hyperplasia	4B	?
0.770138	Benign_prostatic_hyperplasia	4B	?
0.597512	Benign_prostatic_hyperplasia	4B	?
1.70072	Benign_prostatic_hyperplasia	4B	?
0.822013	Benign_prostatic_hyperplasia	4B	?
0.936794	Benign_prostatic_hyperplasia	4B	?
0.608356	Benign_prostatic_hyperplasia	4B	?
0.556012	Benign_prostatic_hyperplasia	4B	?
1.21177	Benign_prostatic_hyperplasia	4B	?
0.803002	Benign_prostatic_hyperplasia	4B	?
0.7831	Benign_prostatic_hyperplasia	4B	?
1.07956	Benign_prostatic_hyperplasia	4B	?
5.99197	Prostate_cancer_tissue	4B	?
5.58563	Prostate_cancer_tissue	4B	?
5.12601	Prostate_cancer_tissue	4B	?
5.90929	Prostate_cancer_tissue	4B	?
4.19108	Prostate_cancer_tissue	4B	?
5.24628	Prostate_cancer_tissue	4B	?
5.1392	Prostate_cancer_tissue	4B	?
0.511636	Prostate_cancer_tissue	4B	?
0.835795	Prostate_cancer_tissue	4B	?
2.20696	Prostate_cancer_tissue	4B	?
0.951845	Prostate_cancer_tissue	4B	?
0.548017	Prostate_cancer_tissue	4B	?
1.63197	Prostate_cancer_tissue	4B	?
1.10157	Prostate_cancer_tissue	4B	?
1.32018	Prostate_cancer_tissue	4B	?
1.59776	Prostate_cancer_tissue	4B	?
0.314779	Prostate_cancer_tissue	4B	?
0.989157	Prostate_cancer_tissue	4B	?
1.56794	Prostate_cancer_tissue	4B	?
0.995087	Prostate_cancer_tissue	4B	?
1.95094	Prostate_cancer_tissue	4B	?
0.708639	Prostate_cancer_tissue	4B	?
0.868422	Prostate_cancer_tissue	4B	?
1.09186	Prostate_cancer_tissue	4B	?
2.15535	Prostate_cancer_tissue	4B	?
0.510547	Prostate_cancer_tissue	4B	?
0.877883	Prostate_cancer_tissue	4B	?
2.15304	Prostate_cancer_tissue	4B	?

## Sheet: S4-SNPs
NCBI_RSID	CHROM	POS	REF:FREQ	ALT:FREQ
rs56095679	8	127982050	C:0.404353	T:0.595647
rs4871769	8	127982070	C:0.313898	T:0.686102
rs4871004	8	127982089	A:0.253195	G:0.746805
rs1386468	8	127982619	G:0.760383	A:0.239617
rs1386469	8	127982673	C:0.760383	G:0.239617
rs1400458	8	127982968	A:0.760184	C:0.239816
rs12681343	8	127983096	G:0.760383	C:0.239617
rs72723998	8	127983124	C:0.758786	T:0.241214
rs72723999	8	127983149	A:0.760383	G:0.239617
rs72724001	8	127983287	G:0.760783	A:0.239217
rs72725804	8	127983476	G:0.760982	A:0.239018
rs67452692	8	127983686	G:0.760982	A:0.239018
rs78889180	8	127983693	A:0.760783	G:0.239217
rs11779288	8	127983941	A:0.760982	G:0.239018
rs6994848	8	127984019	C:0.760783	T:0.239217
rs6995267	8	127984065	G:0.760982	A:0.239018
rs9650093	8	127984089	A:0.866414	G:0.133586
rs6995014	8	127984159	A:0.760982	G:0.239018
rs6995345	8	127984282	C:0.761182	T:0.238818
rs6995202	8	127984283	A:0.761182	G:0.238818
rs74953806	8	127984297	C:0.92512	T:0.0748802
rs6995896	8	127984435	G:0.760982	A:0.239018
rs6996064	8	127984550	G:0.760982	A:0.239018
rs7000622	8	127984985	G:0.760982	A:0.239018
rs6982419	8	127985011	T:0.760383	A:0.239617
rs7000635	8	127985014	G:0.760383	A:0.239617
rs7000509	8	127985063	C:0.760583	G:0.239417
rs7000362	8	127985065	A:0.760583	G:0.239417
rs7000954	8	127985209	G:0.760982	A:0.239018
rs7001123	8	127985291	G:0.761182	A:0.238818
rs35386722	8	127985445	G:0.760982	A:0.239018
rs117334546	8	127985490	G:0.92492	A:0.0750799
rs34449467	8	127985548	G:0.759585	A:0.240415
rs35917675	8	127985560	G:0.759784	A:0.240216
rs34180985	8	127985695	T:0.761182	C:0.238818
rs2392679	8	127986228	C:0.760982	T:0.239018
rs2392680	8	127986359	C:0.760583	T:0.239417
rs2392681	8	127986370	A:0.760583	T:0.239417
rs2392682	8	127986378	C:0.760583	G:0.239417
rs72725809	8	127986415	A:0.925319	T:0.0746805
rs2392683	8	127986466	G:0.260982	A:0.739018
rs2392684	8	127986483	C:0.659944	T:0.340056
rs7011144	8	127987116	C:0.760982	A:0.239018
rs6993395	8	127987156	T:0.760982	C:0.239018
rs7011302	8	127987247	A:0.760982	T:0.239018
rs1516944	8	127987578	A:0.355032	G:0.644968
rs1516945	8	127987909	C:0.760583	T:0.239417
rs1516946	8	127988059	C:0.760583	T:0.239417
rs1516947	8	127988114	T:0.760583	C:0.239417
rs1516948	8	127988203	C:0.760583	G:0.239417
rs7017273	8	127988350	G:0.760583	A:0.239417
rs11780179	8	127988625	T:0.760583	C:0.239417
rs11780182	8	127988683	T:0.760583	C:0.239417
rs11776596	8	127988686	G:0.760583	A:0.239417
rs748485	8	127989245	C:0.760783	G:0.239217
rs72725812	8	127989350	G:0.926917	A:0.0730831
rs748484	8	127989575	C:0.760783	T:0.239217
rs2392620	8	127989760	T:0.760783	C:0.239217
rs901592	8	127989849	A:0.479034	C:0.520966
rs78804418	8	127989850	G:0.92512	A:0.0748802
rs753229	8	127990024	G:0.760783	A:0.239217
rs7014448	8	127990833	T:0.248802	G:0.751198
rs72725816	8	127990853	G:0.761182	T:0.238818
rs34227520	8	127990929	C:0.760583	T:0.239417
rs1487235	8	127990957	G:0.760583	A:0.239417
rs12677837	8	127991703	G:0.760583	T:0.239417
rs34958055	8	127991749	G:0.760783	A:0.239217
rs12675177	8	127991955	C:0.760783	T:0.239217
rs7823233	8	127992577	T:0.760982	C:0.239018
rs7839440	8	127992614	C:0.760982	T:0.239018
rs79866008	8	127992639	A:0.821685	G:0.178315
rs7839581	8	127992658	C:0.760982	G:0.239018
rs11985977	8	127992674	G:0.867612	A:0.132388
rs71520608	8	127992871	G:0.890176	A:0.109824
rs145716495	8	127992931	C:0.895767	T:0.104233
